# Supplementary material
Source: PubMed Central journal article supplement (PMC9077118)

1A: Fetal Sex Analysis First Trimester PC1 V PC2

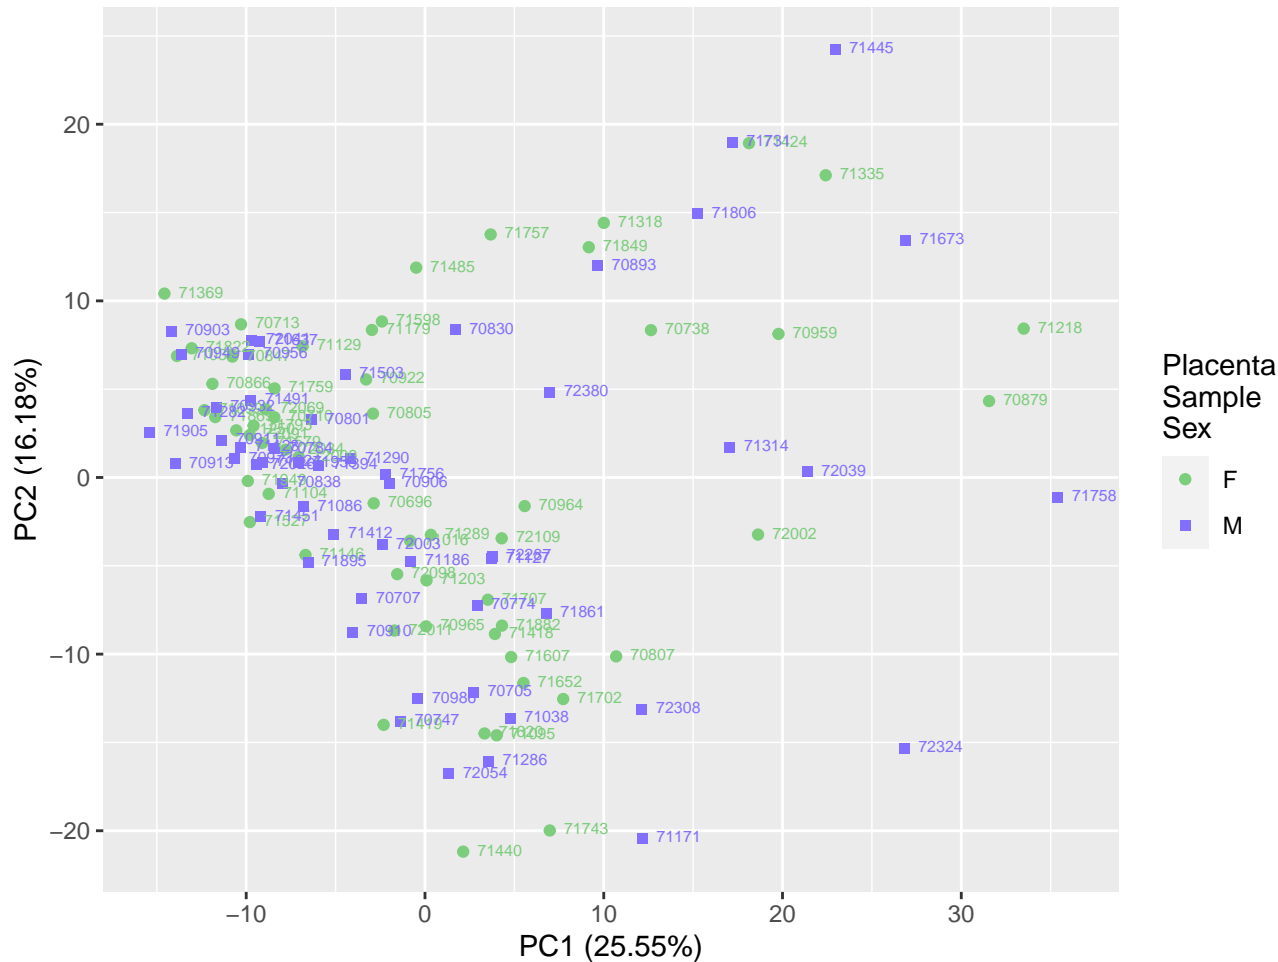



# 1C: Fetal Sex Analysis First Trimester PC2 V PC3

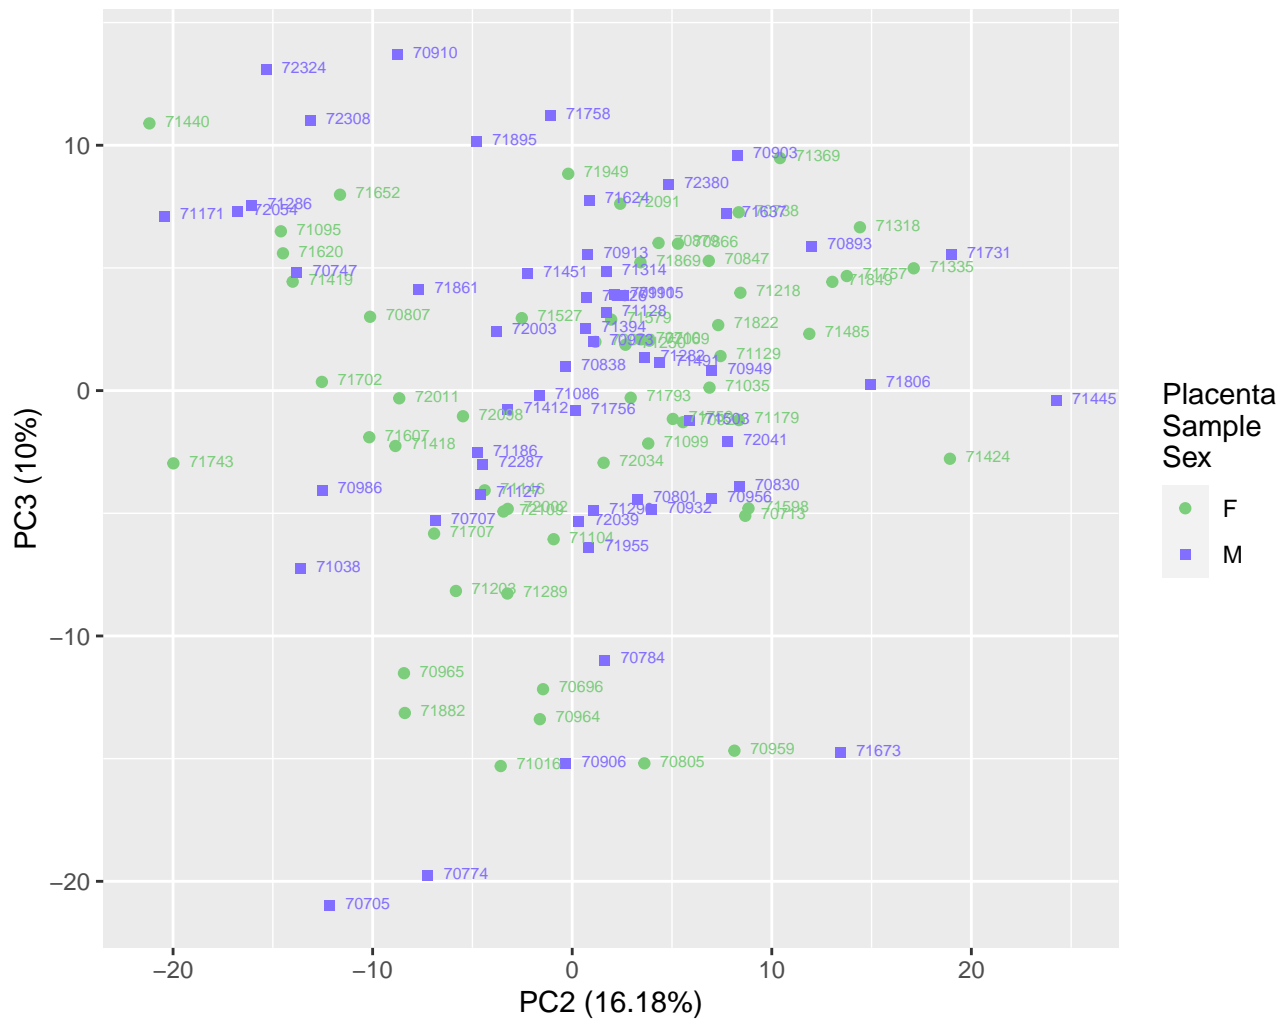

2A: Fetal Sex Analysis Third Trimester PC1 V PC2

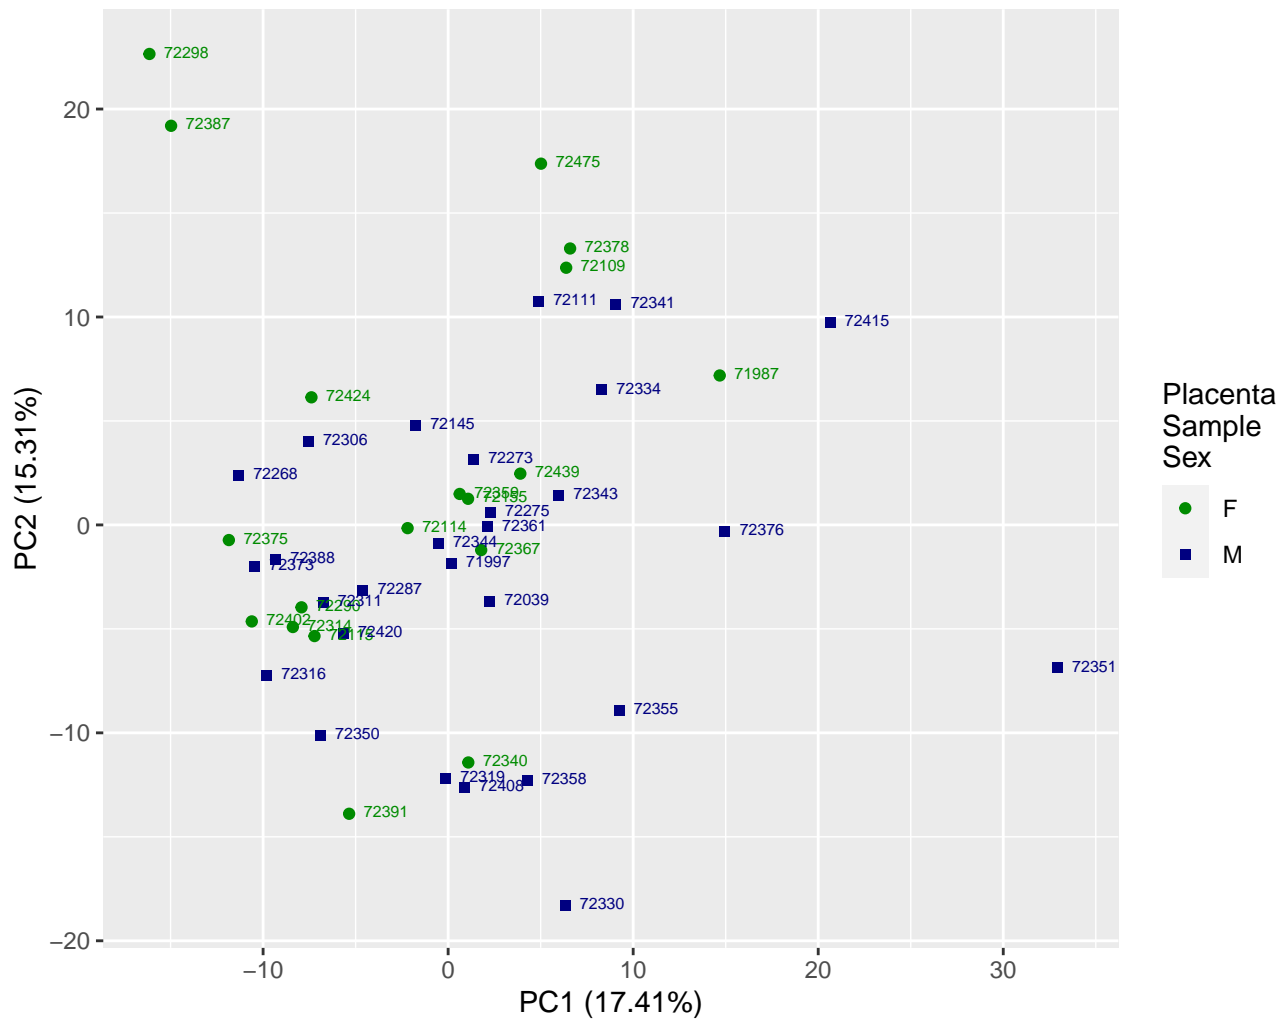

2B: Fetal Sex Analysis Third Trimester PC1 V PC3

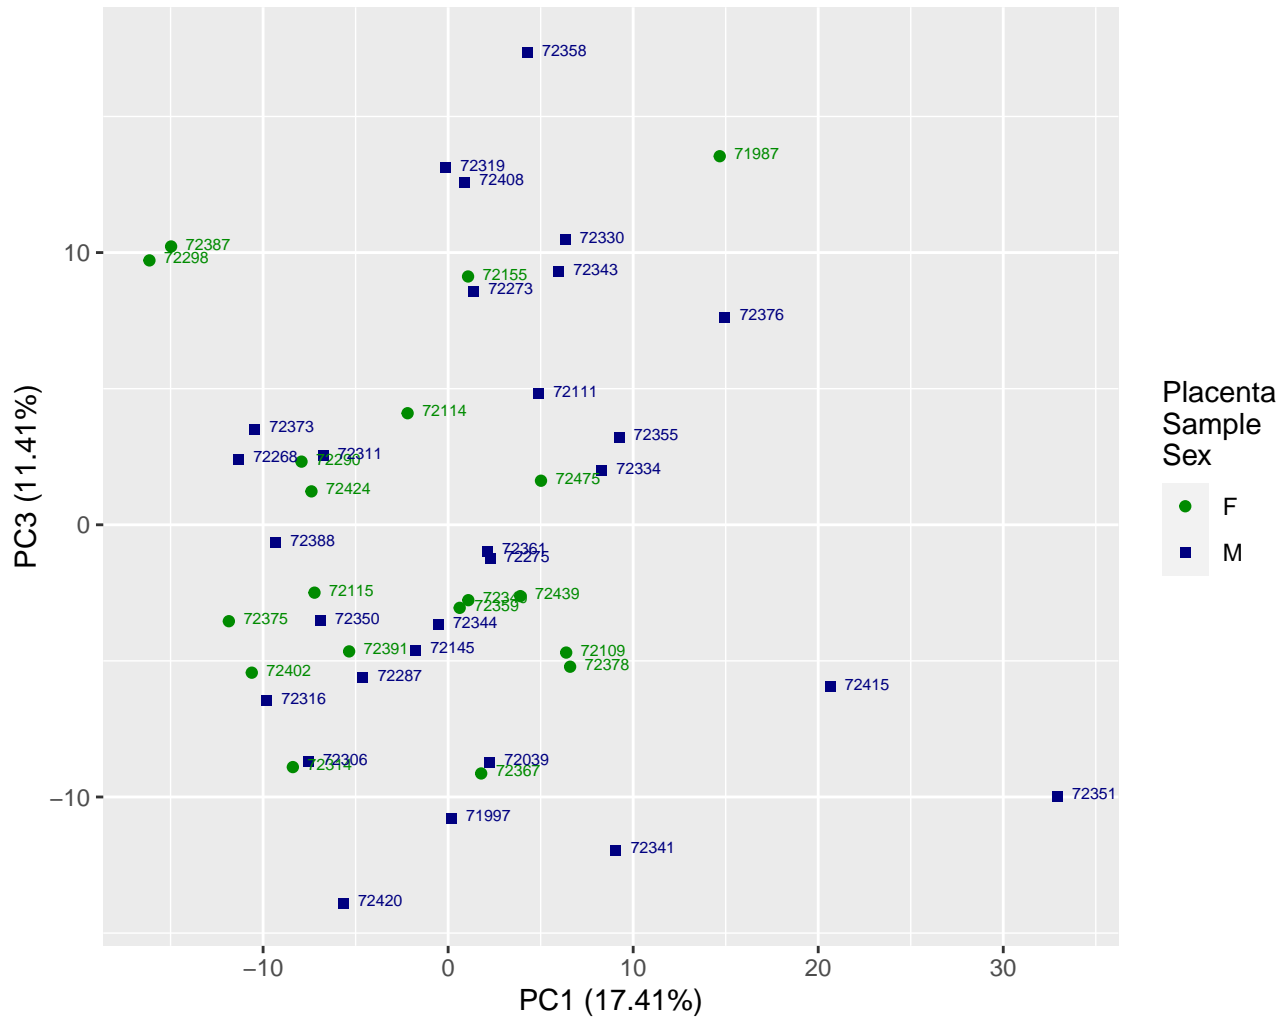

2C: Fetal Sex Analysis Third Trimester PC2 V PC3

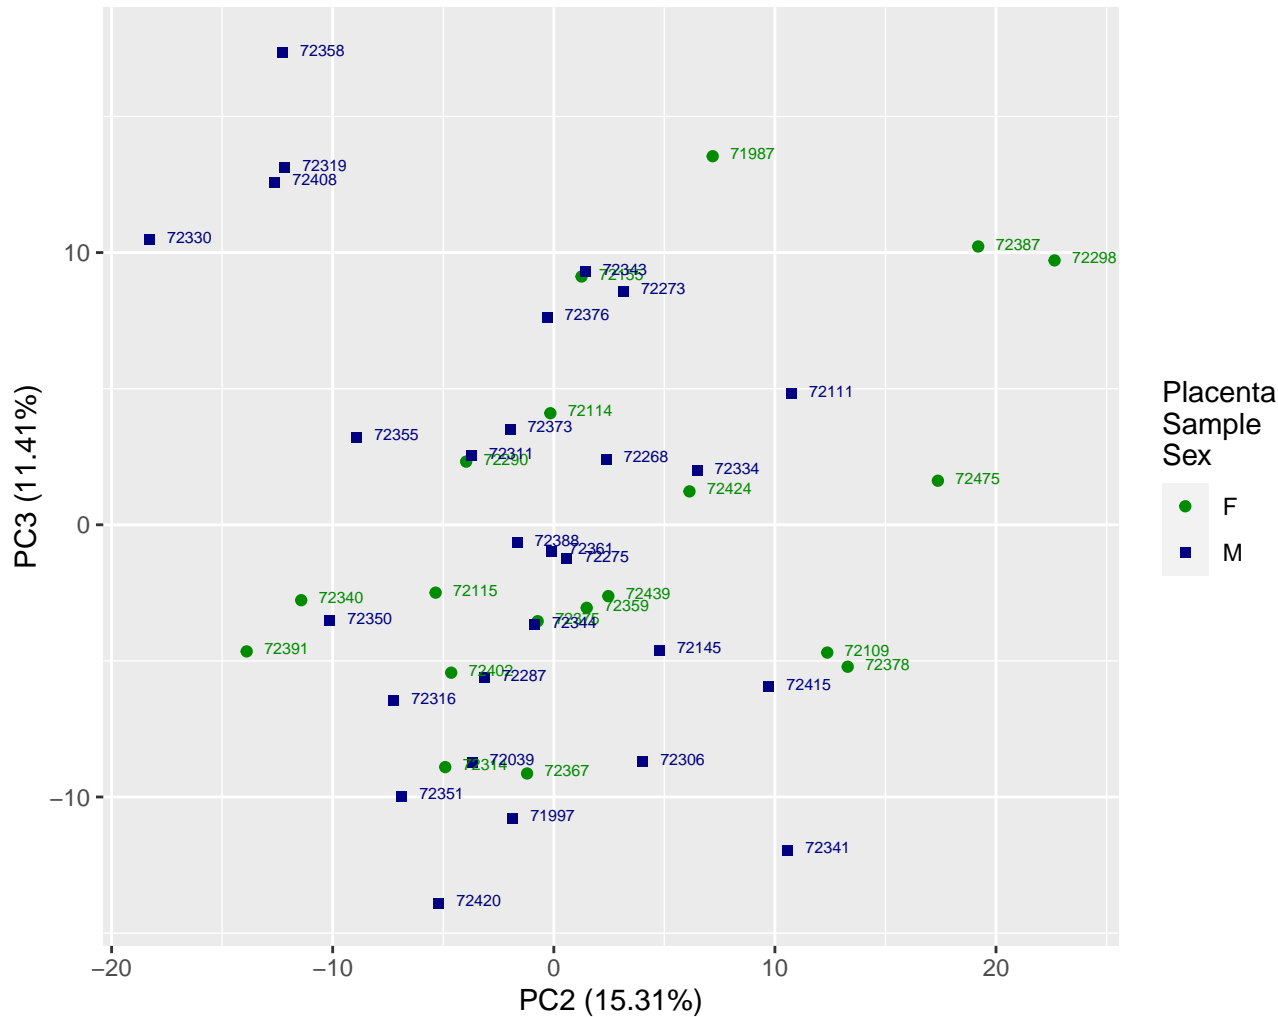







### 3C: Fetal Sex Analysis Females PC2 V PC3

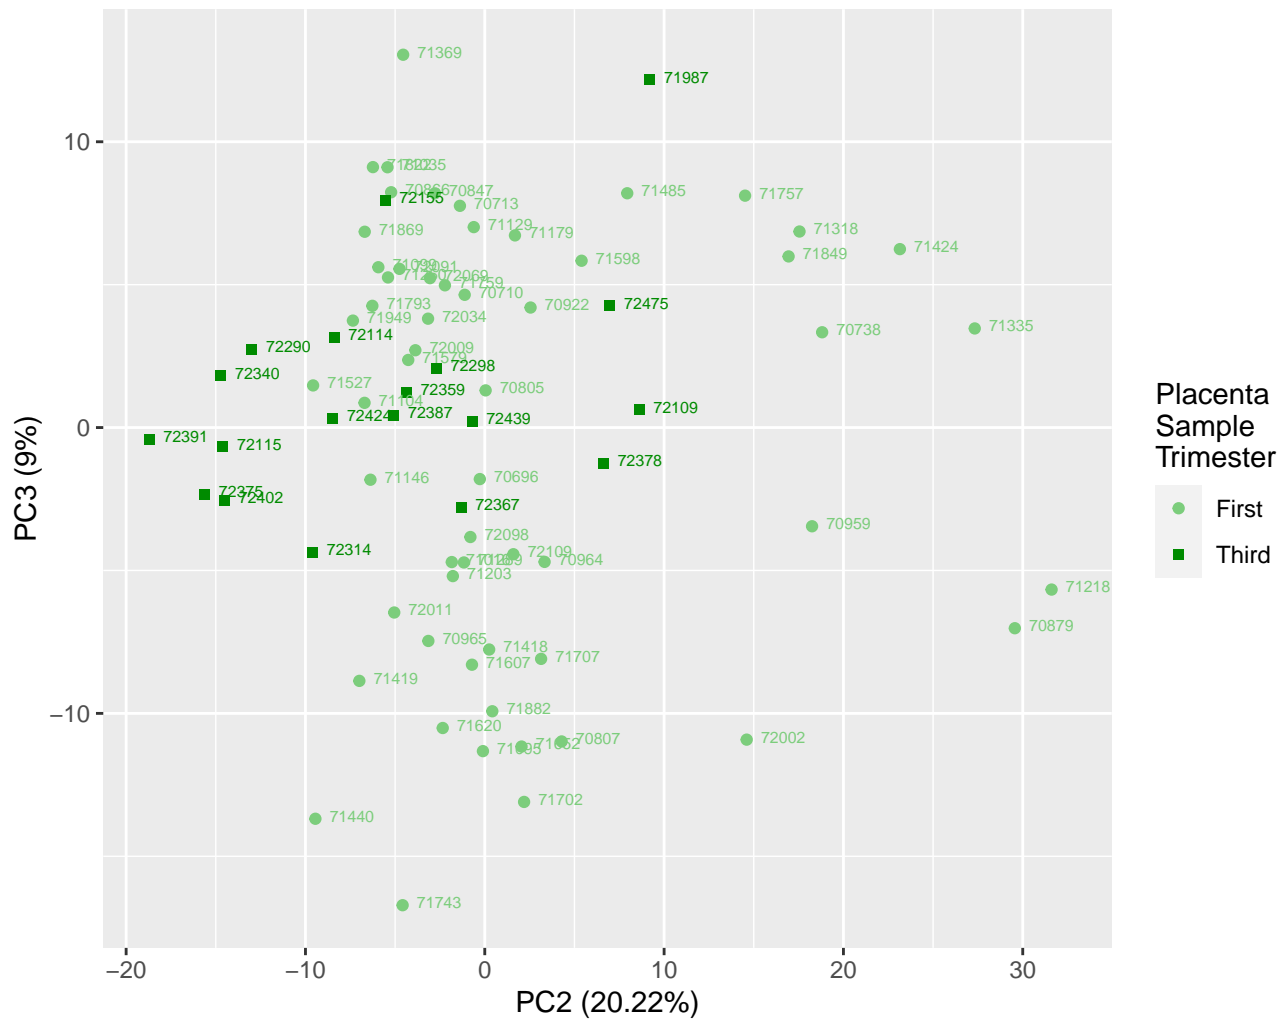

#### 4A: Fetal Sex Analysis Males PC1 V PC2

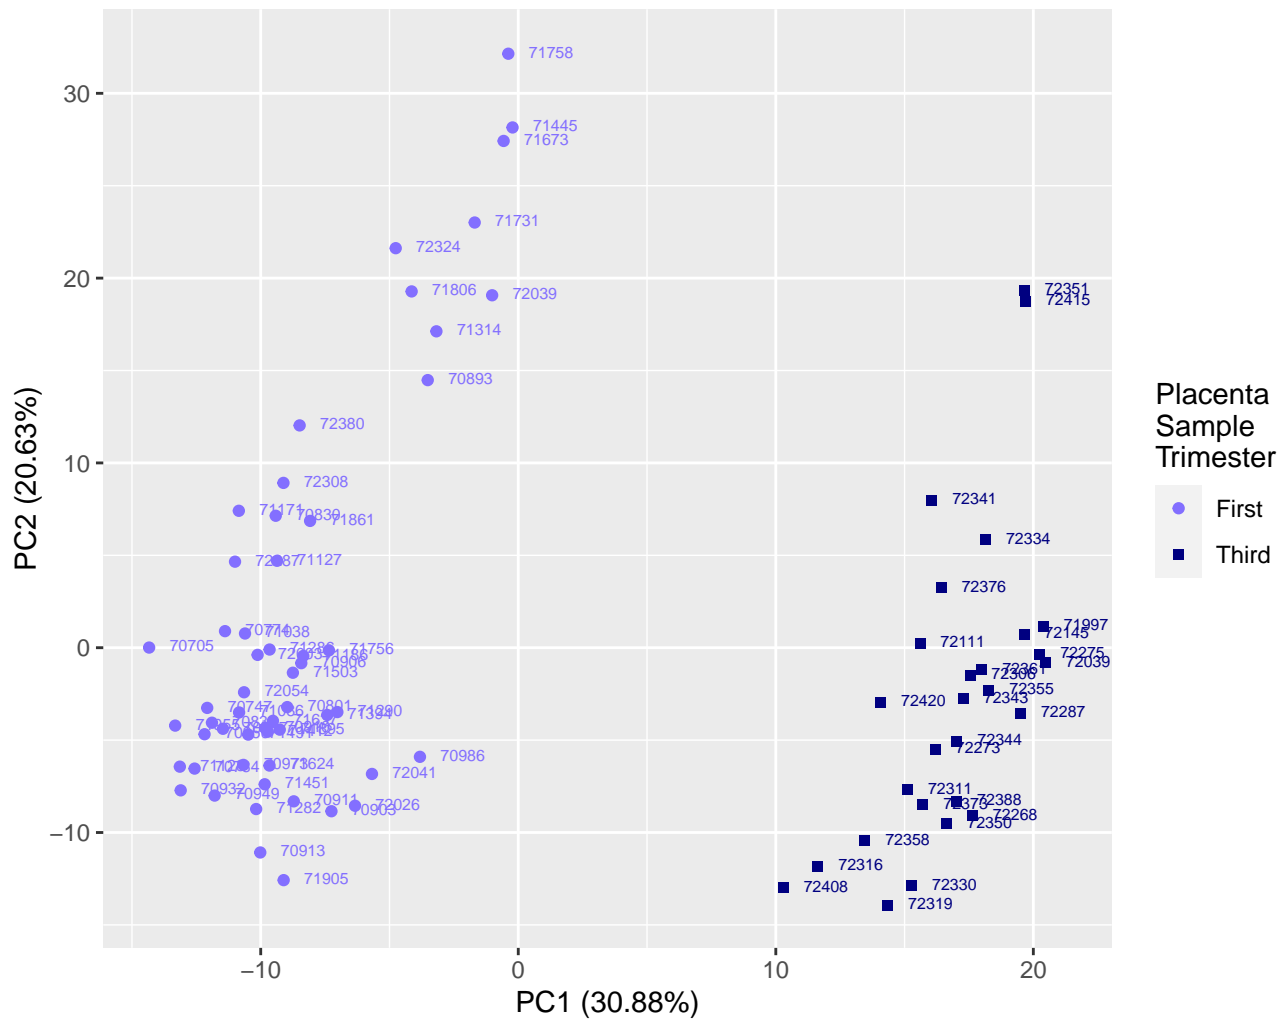

4B: Fetal Sex Analysis Males PC1 V PC3

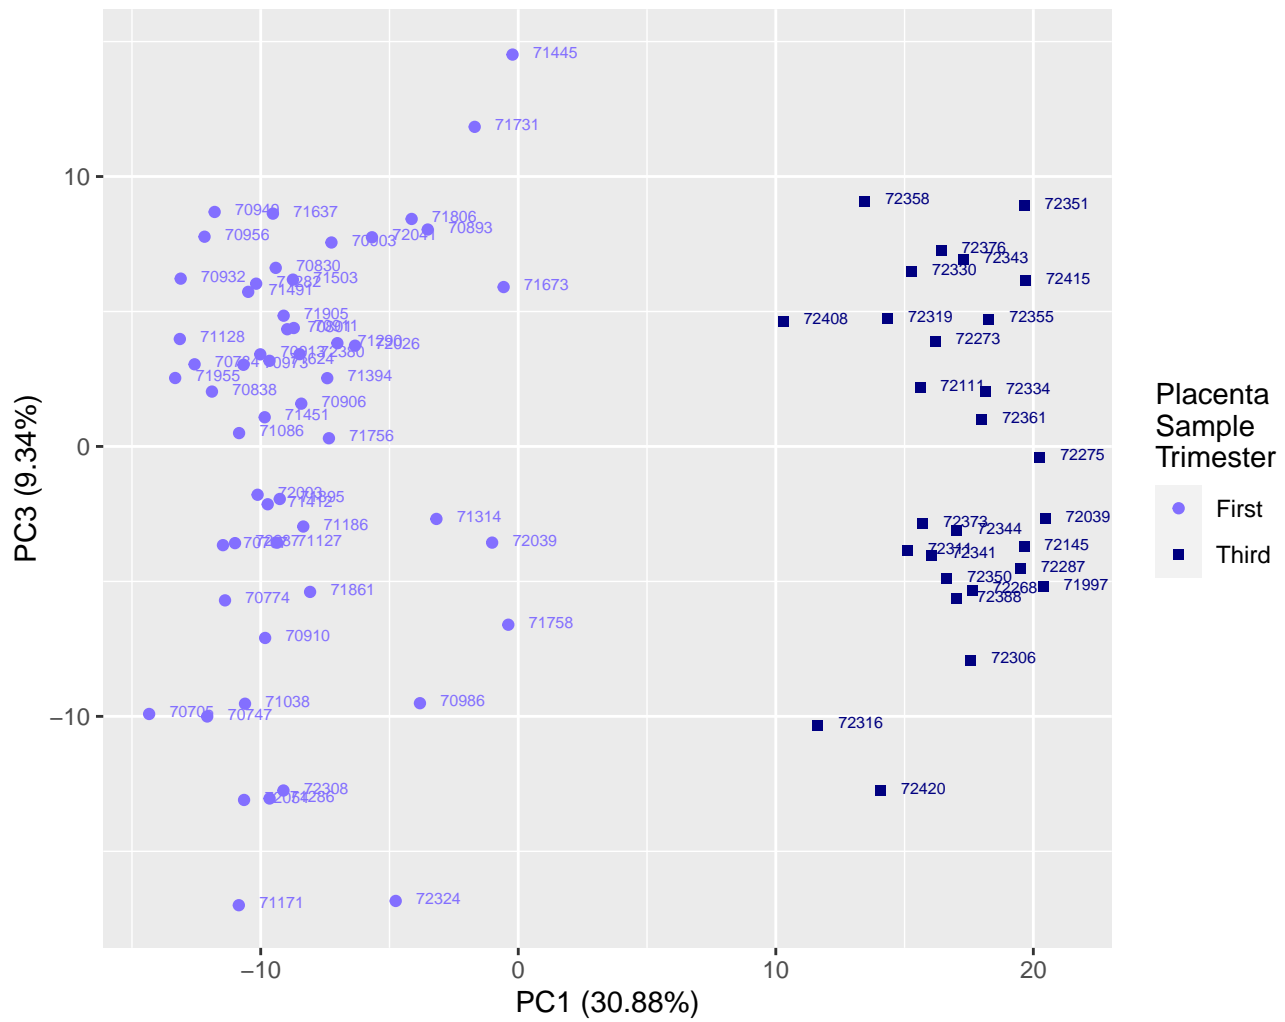

Supplement: supplemental_file_1_ioab221.pdf [file supplemental_file_1_ioab221.pdf]
