# Supplementary material
Source: PubMed Central journal article supplement (PMC9077118)

A

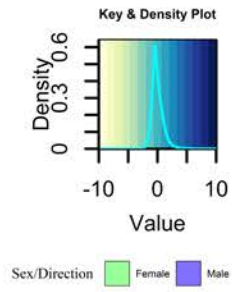

All Expressed miRNAs: First Trimester

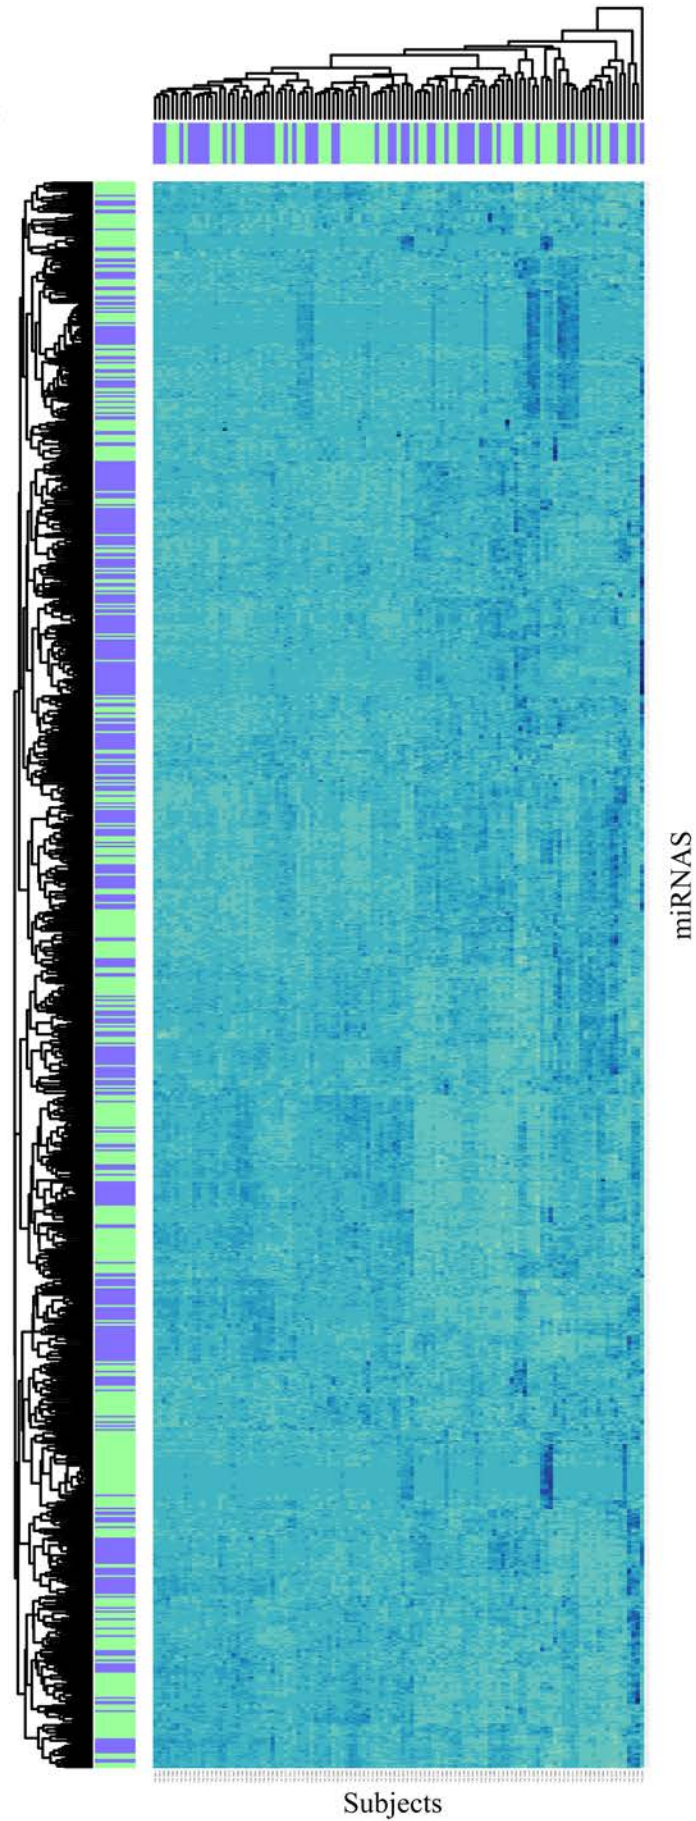

**B**

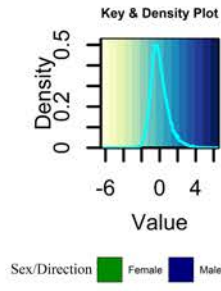

All Expressed miRNAs: Third Trimester

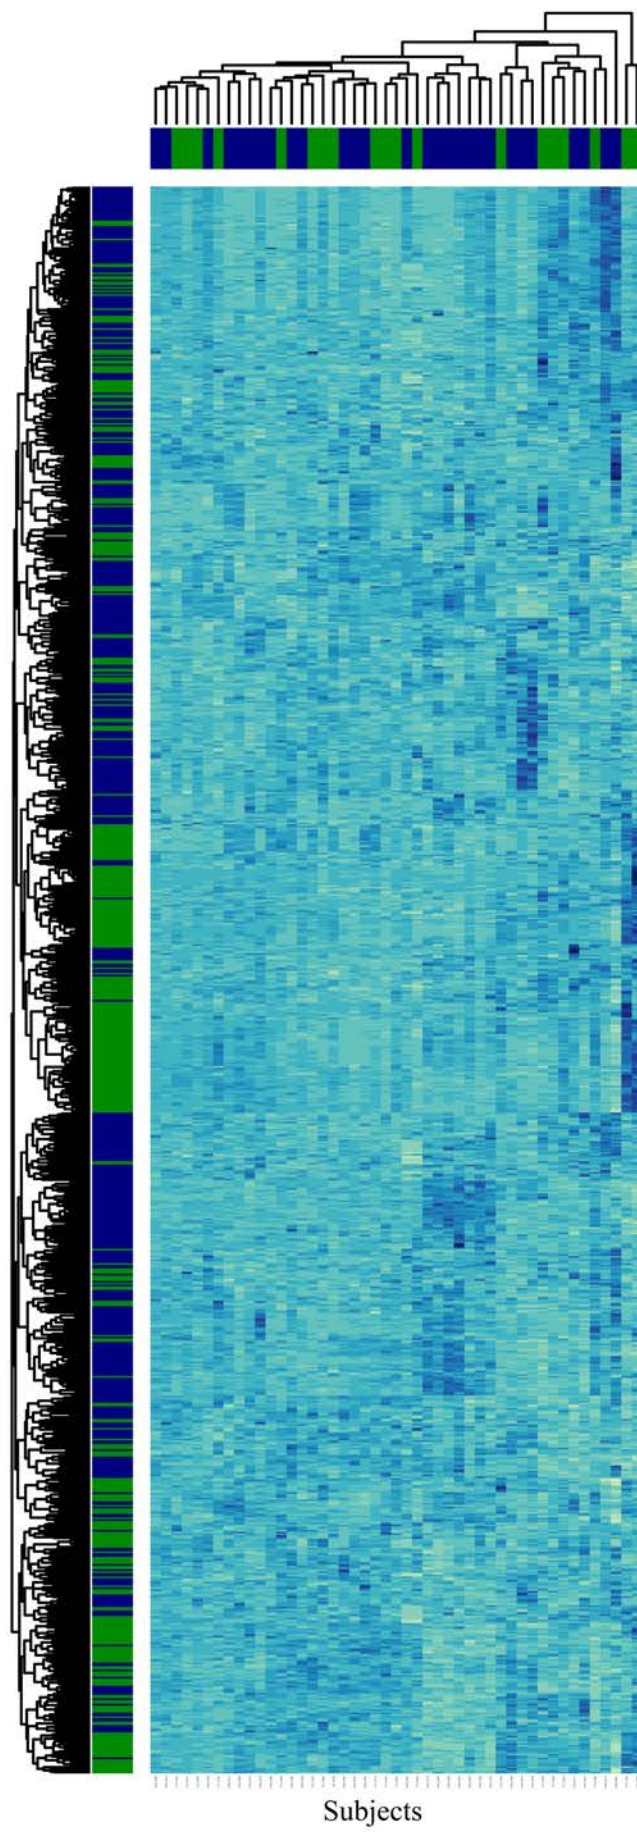



C

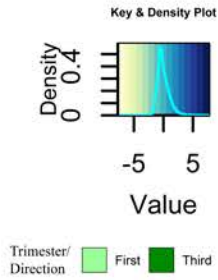

All Expressed miRNAs: Females

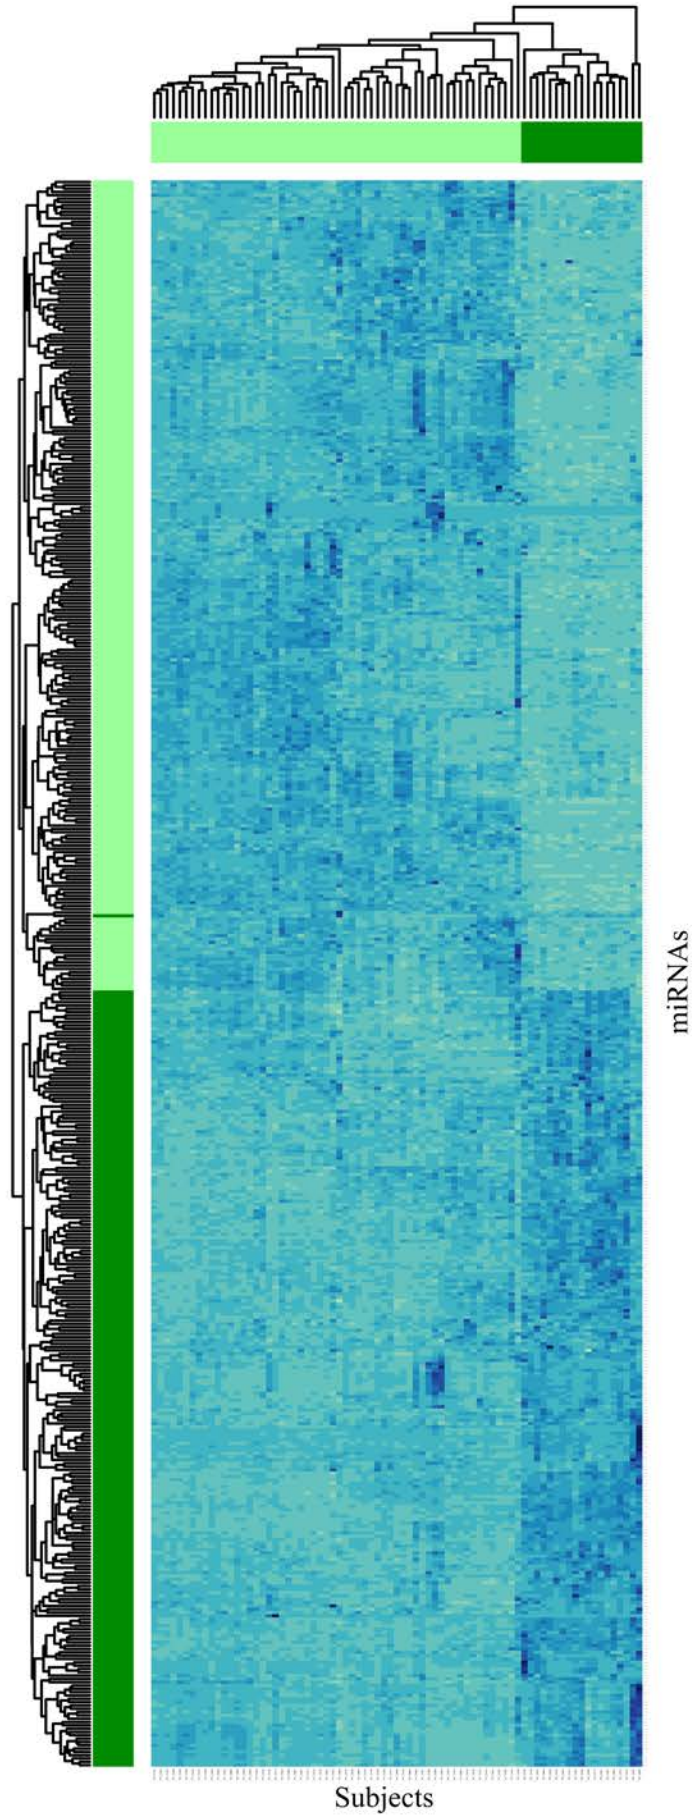

D

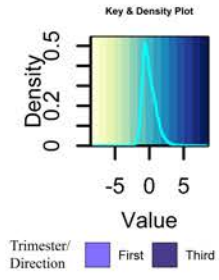

All Expressed miRNAs: Males

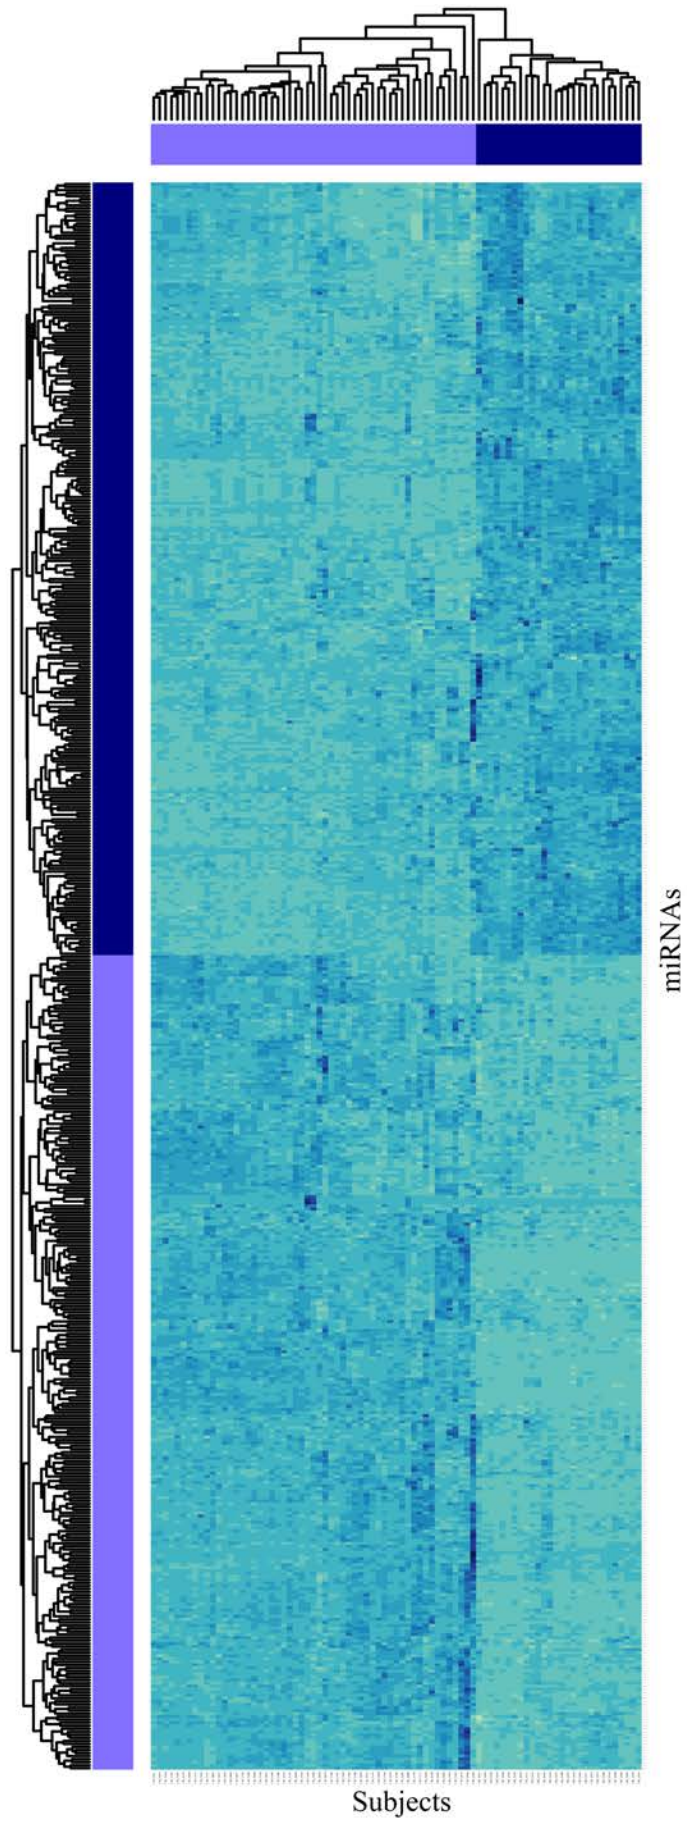

Supplement: supplemental_file_4_ioab221.pdf [file supplemental_file_4_ioab221.pdf]
