# Supplementary material
Source: PubMed Central journal article supplement (PMC9077118)
Supplement: supplemental_file_5_ioab221.pdf [file supplemental_file_5_ioab221.pdf]

# Supplemental File

**A**

DE miRNAs for sex-specific first vs third trimester placenta  
(FDR<0.05, baseMean>10 either trimester)

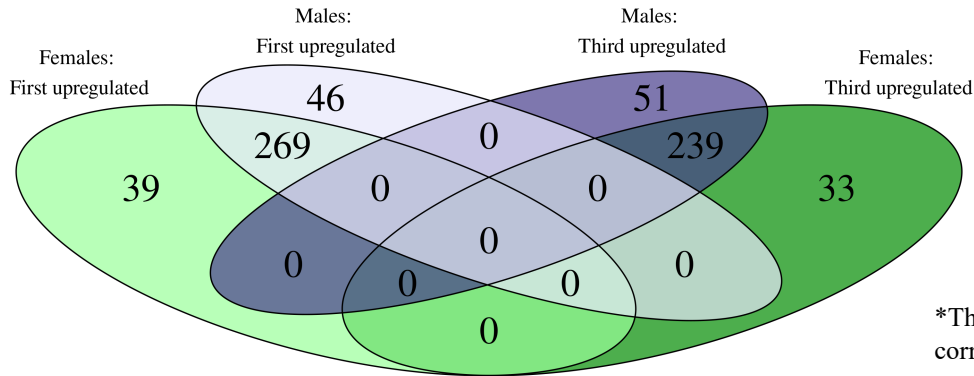

\*This venn diagram corresponds to Figure 3

**B**

DE miRNAs for sex-specific first vs third trimester placenta  
(FDR<0.05, baseMean>10 either trimester, fold change>2)

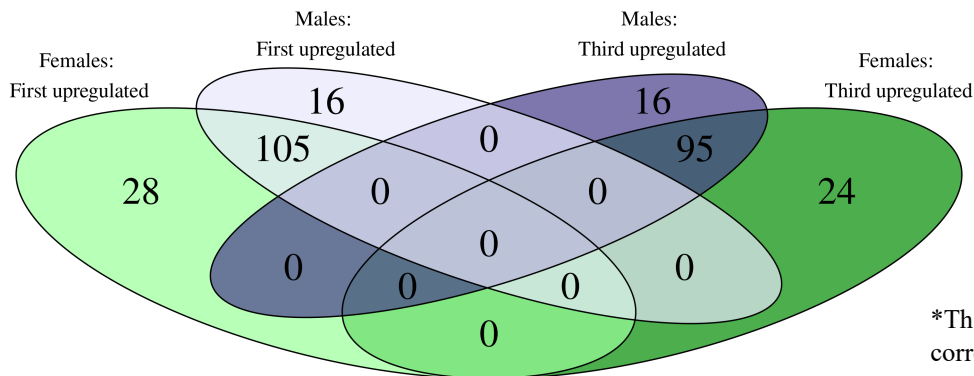

\*This venn diagram corresponds to Figure 4A

**Terms and abbreviations:**

baseMean = counts normalized by sequencing depth by the DESeq2 R package

DE = differentially expressed

FDR = p-values adjusted by Benjamini-Hochberg's false discovery rate procedure
